# Supplementary material for: Increased microRNA-30a levels in bronchoalveolar lavage fluid as a diagnostic biomarker for lung cancer
Source: PeerJ. 2021 Jun 9;9:e11528. doi: 10.7717/peerj.11528 (PMC8197034; doi:10.7717/peerj.11528)
Supplement: Supplemental Information 1 — The relative expression of miRNA-30a in BALF, and other information including the demographic characteristics and clinical parameters of all participants. [file peerj-09-11528-s001.xls]

## Sheet: sheet1
pcr number	1=malignant 2=benign	Pathology type: 1=inflammation 2=squamous carcinoma 3=Adenocarcinoma 4=small cell lung cancer 5=Large cell lung cancer	BALF miRNA-30a expression to U6	Gender: 1=Male 2=Female	Smoking history: 1=Smoke 2=Never smoke	Lung cancer type：1=SCLC 2=NSCLC	CEA(U/ml)	CA19-9(U/ml)	CA-125(U/ml)	CYFRA21-1(U/ml)	NSE(U/ml)	lg30: logarithmic transformation of miRNA30a	Age(yr)	BMI(kg/m2)	PS Score	EGFR 0=negative 1=positive	ALK 0=negative 1=positive	ROS 0=negative 1=positive	TNM 1=I stage 2a=IIa stage 2b=IIb stage 3=III stage 4=IV stage	TNM 1=Early stage(I&IIa stage) 2=Late stage(IIb&III&IV stage)	BMI 1=thin 2=normal 3=mild obesity 4=obesity 5=severe obesity	Smoking pack-year	Age 1=≤60 year-old 2=> 60 year-old
1	1	1	2.01452	2	2							0.304172	43	20.03	0						2	0	1
2	0	3	0.9953	1	1	2						-0.002046	50	22.03	1		0	0	4	2	2	5	1
3	1	1	1.21496	1	1							0.084562	52	21.77	0						2	25	1
4	1	1	0.29145	1	2							-0.535436	45	23.03	0						3	0	1
5	1	1	0.3231	1	2		2.55	28.57	14.45	2.08	17	-0.490663	67	23.78	0						3	0	2
6	1	1	0.93588	1	1		1.37	6.36		1.16	13.14	-0.0287798	65	23.87	0						3	36	2
8	0	3	1.09422	2	2	2	2.75	9.07	20.61	1.16	11.9	0.0391046	47	26.56	0	1	0	0	3	2	4	0	1
12	0	2	2.29655	1	1	2						0.361076	51	24.02	0				3	2	3	30	1
13	0	3	5.8308	2	2	2	7.49			15.89		0.765728	46	21.07	0						2	0	1
14	0	3	1.21908	2	2	2						0.0860322	56	22.31	1		0	0	1	1	2	0	1
15	1	1	1.31623	2	2						9.53	0.119332	60	24.03	0						3	0	1
17	0	4	13.3626	1	1	1						1.12589	73	23.87	2				3	2	3	22.5	2
19	1	1	2.69652	1	2		0.56	4.98	10.58	1.81	8.69	0.430804	50	24.02	0						3	0	1
26	1	1	2.87853	2	2							0.459171	44	24.03	1						3	0	1
27	0	2	13.1009	1	1	2	1.85			13.78	23.61	1.1173	62	22.22	0				4	2	2	3	2
28	1	1	3.27626	1	1							0.515378	26	21.48	0						2	5.25	1
30	0	3	15.4665	1	1	2	2.39	6.91	11.43	1.29	11.67	1.18939	66	23.73	0		0	0			3	30	2
31	0	2	2.57267	1	1	2						0.410384	65	23.33	0						3	40	2
33	0	3	2.35173	1	1	2	0.93	65.89	76.41	11.37	25.14	0.371387	57	21.29	1		0	0	4	2	2	30	1
38	0	4	7.65212	1	1	1						0.883782	70	23.66	1						3	40	2
39	0	3	72.9675	2	2	2	2.42	7.79	16.84	2.29	12.28	1.86313	55	21.85	0	1	0		1	1	2	0	1
40	0	2	25.8904	1	1	2						1.41314	46	28.4	0						4	15	1
41	0	3	7.67343	1	1	2	1.93		27.65	1.15	10.56	0.88499	55	28.01	0	0	0	0	1	1	4	3	1
42	0	3	30.4654	1	1	2	0.99		21.89	1.34	11.03	1.48381	51	22.49	1	0	0	0	1	1	2	2	1
43	1	1	1	1	1		4.31			1.42	10.78	0	67	24.09	2						3	10	2
44	0	2	3.64952	1	1	2						0.562236	65	21.48	2						2	5	2
47	0	3	98.6058	2	2	2	38.35	8.84	204.1	16.63	38.27	1.9939	68	23.24	0	1	0	0	4	2	3	0	2
49	0	3	26.857	2	2	2	1.82	79.16	22.62	5.44	9.32	1.42906	65	19.05	0				3	2	2	0	2
51	0	2	2.03636	1	1	2						0.308855	65	21.35	1				3	2	2	30	2
52	0	5	2.35059	1	1	2	1.98	8.34	17.55	2.04	12.6	0.371177	51	25.23	1	0	0	0	3	2	4	52.5	1
53	1	1	0.44226	2	2							-0.354322	29	19.05	0						2	0	1
54	0	4	2.63536	1	1	1	30.03			2.53	15.23	0.42084	60	21.33	1		0	0	2b	2	2	88	1
55	0	4	1	1	1	1	3.56			2.85	22.87	0	60	26.12	2				3	2	4	15	1
56	0	4	7.92579	1	1	1	2.12	5.7	27.87	6.12	52.38	0.899043	67	24	1				4	2	3	50	2
59	0	3	4.75921	2	2	2	1.47	17.19	6.24	0.97	13.16	0.677535	52	23.03	0				1	1	3	0	1
61	0	3	1.49309	1	1	2	602.5			5.63	44.03	0.174086	50	26.07	0	0	0	0	4	2	4	10	1
62	0	2	4.95621	1	2	2						0.69515	73	21.35	2		0	0	3	2	2	0	2
64	0	3	2.67109	1	1	2	15.01	19.48	32.82	3.81	12.52	0.426689	57	19.03	0		0	0	4	2	2	26	1
66	0	4	1.22552	1	1	1	2.78	13.2	63.04	2.53	26.93	0.0883204	60	25.95	0				3	2	4	40	1
67	0	3	55.0988	1	1	2						1.74114	57	18.35	0				2b	2	1	28.8	1
68	1	1	4.78262	2	2		2.99	34.86	11.04	1.83	11.27	0.679666	68	16.16	1						1	0	2
69	1	1	2.031	1	2		2.42	34	8.7	3.37	12.79	0.30771	55	20.28	0						2	0	1
70	0	3	0.99648	1	1	2	3.82	10.65	16.93	7.12	18.13	-0.00153141	63	19.53	1	0	0	0	4	2	2	20	2
72	0	3	2.03215	1	1	2						0.307956	35	24.96	0		0		3	2		10	1
73	0	2	2.97802	2	2	2						0.473928	76	17.77	4	1			4	2	1	0	2
74	0	3	7.71987	1	2	2						0.88761	61	24.22	0		0	0			3	0	2
79	0	4	6.59204	2	2	1	2.68	13.48	9.46	2.11	14.26	0.81902	50	23.8	0				2b	2	3	0	1
80	0	4	2.22217	2	2	1						0.346777	60	22.89	3						2	0	1
83	1	1	0.54474	1	1		2.88	3.35	16.19	1.74	13.52	-0.263811	44	19.15	0						2	24	1
86	0	3	2.64098	1	1	2	1.99		115.5	5.18		0.421765	26	20.51	0						2	1.5	1
87	1	1	0.33455	1	2							-0.475539	63	27.71	1						4	0	2
90	1	1	0.3636	2	2							-0.439376	50	27.76	0						4	0	1
95	0	3	12.1355	2	2	2	2.67	26.07	15.6	1.81	10.66	1.08406	63	24.13	0		0	0	1	1	3	0	2
96	0	3	3.10023	1	1	2						0.491394	62	24.91	1				1	1		27	2
98	0	3	14.6674	2	2	2	56.12	7.15	33.98	1.73	10.16	1.16635	44	18.28	0	1	0	0	4	2	1	0	1
99	0	3	3.75179	1	1	2	2.47	8.87	15.54	5.28	13.73	0.574239	76	26.7	3	0	0	0	4	2	4	30	2
101	1	1	7.13483	2	2		1.32		13.89	2.88		0.853384	67	23.43	0						3	0	2
103	1	1	1.96304	1	1							0.292929	55	27.68	0						4	4	1
106	0	2	17.9586	1	1	2		18.22				1.25427	63	21.3	0				3	2	2	15	2
107	0	2	4.47799	1	1	2	6.88	185.3	14.82	4.86	33.21	0.651083	57	19.92	1						2	30	1
108	1	1	4.69531	2	2		2	0.6	4.87	1.01	11.61	0.671664	44	23.49	0						3	0	1
109	0	3	3.11538	2	2	2	2.27	7.14	8.49	4.69	17.29	0.493511	62	25.55	0				3	2	4	0	2
112	0	3	10.2031	1	1	2	108.6		15.12	3.68	9.96	1.00873	47	24.09	1	1			1	1	3	25	1
113	0	2	9.44615	1	2	2						0.975255	42	18.82	0						2	0	1
114	0	3	5.69671	2	2	2	3.72			1.54	28.27	0.755624	52	27.34	0		0	0	3	2	4	0	1
115	1	1	2.6092	1	2		0.72			2.73	42.37	0.416507	58	27.54	0						4	0	1
116	0	4	4.91586	1	1	1	3.4	14.25	47.47	1.83	28.92	0.6916	62	22.49	3				3	2	2	30	2
117	1	1	0.2321	1	1		4.44	9.89	136.7	2.98	6.72	-0.634325	52	21.21	3						2	40	1
119	0	2	2.53212	2	2	2	7.78	183.2	69.81	3.77	16.31	0.403484	59	19.22	4		0	0	4	2	2	0	1
120	0	3	3.64228	1	1	2	5.64	6.98	59.11	5.46	3.69	0.561373	63	22.22	3	1	0	0	3	2	2	60	2
123	1	1	0.95505	1	1		1.23	7.26	10.34		9.78	-0.0199739	57	21.71	0						2	17	1
126	1	1	0.69909	1	1							-0.155467	34	24.48	1						3	10	1
128	1	1	1.04693	1	1							0.0199176	42	23.66	0						3	18	1
133	0	3	1.0662	2	2	2						0.0278387	55	19.47	1		0	0	4	2	2	0	1
134	0	4	6.35692	1	1	1						0.803247	43	26.07	0						4	18	1
136	0	2	1.07706	1	2	2	1.63	9.71	9.18	3.02	10.45	0.0322399	51	20.2	1				3	2	2	0	1
137	1	1	0.72046	1	2							-0.14239	43	22.49	0						2	0	1
138	0	3	6.12907	2	2	2	14.5	8.59	14.08	0.95	12.73	0.787395	40	19.62	0		0	0	4	2	2	0	1
139	1	1	0.05511	2	2							-1.25877	52	27.05	0						4	0	1
144	0	4	1.18271	1	1	1	0.67	33.75	1658	8.25	45.68	0.0728783	71	19.48	3				3	2	2	30	2
145	1	1	6.60358	1	2		1.16	7.42	18.86	1.06	18.72	0.819779	64	22.49	2						2	0	2
146	1	1	0.96989	1	1		3.15	19.6	33.42	1.64	10.83	-0.0132775	75	15.43	0						1	40	2
147	1	1	2.4967	2	2							0.397366	59	25.77	0						4	0	1
148	1	1	0.3295	2	2		2.78			1.54	30.16	-0.482145	51	26.89	0						4	0	1
149	0	4	94.9177	1	1	1						1.97735	65	23.41					3	2		30	2
150	1	1	0.46081	1	2		1.85	24.05	28.64	1.8	8.99	-0.336478	49	24.38	0						3	26	1
152	0	2	2.16227	1	1	2						0.33491	73	23.43	2				2b	2	3	40	2
153	1	1	1.18949	2	2							0.0753608	60	16.44	0						1	0	1
154	0	3	3.08151	1	1	2	1.36	5.4		2.37	11.13	0.488764	63	21.71	0		0	0	1	1	2	30	2
162	0	3	1.07305	1	1	2	2.75	8.18	9.05		18.59	0.03062	74	22.32	0		0	0	4	2		40	2
167	0	3	2.09702	2	2	2	27.59			16.69	22.87	0.321603	61	23.83	0		0		4	2	3	0	2
168	1	1	0.25995	1	1							-0.58511	53	25.07	1						4	20	1
169	1	1	0.22435	1	1		2.91			2.95	10.08	-0.649074	68	33	3						5	6	2
170	1	1	1.21985	1	1		0.85	4.08	6.32	1.4	9.43	0.0863064	51	18.73	1						2	37.5	1
173	1	1	1.91123	1	1		1.57	6.88	12.44	2.61	8.81	0.281313	57	19.72	0						2	15	1
177	0	2	2.92408	1	1	2						0.465989	48	23.05	0		0	0	3	2	3	8	1
183	0	3	3.60597	2	2	2						0.557022	54	24.03	0	1	0	0	3	2	3	0	1
187	0	2	3.94975	1	1	2						0.59657	48	20.06	0		0	0	1	1	2	20	1
189	0	3	5.43031	2	2	2	178.7			7.02	14.47	0.734825	39	18.81	0				3	2	2	0	1
191	1	1	0.84978	1	1		4.6			2.82	35.04	-0.0706935	48	24.23	0							10	1
195	1	1	0.5966	1	1		9.52			3.62	10.27	-0.224317	44	24.67	0						3	37.5	1
198	0	3	1.27354	1	1	2	4.62	24.49	11.78	2.13	12.8	0.105013	43	25.63		1	0	0	3	2		20	1
199	0	3	11.7651	1	1	2	3.4	17.9	57.21	2.91	29.52	1.07059	73	22.09	1		0	0	4	2	2	80	2
200	1	1	1.96832	1	2							0.294096	58	29.05	0						4	0	1
203	0	3	2.86674	2	2	2	8.6	16.33	12.14	6.56		0.457388	62	17.85	2						1	0	2
204	1	1	0.51169	2	2		1.49			2.97	16.34	-0.290993	69	18.73	0						2	0	2
205	0	2	3.32475	1	1	2						0.521759	61	22.85	2				3	2	2	40	2
207	0	3	3.27972	2	2	2						0.515837	46	20.31	0	1	0	0	1	1	2	0	1
208	1	1	0.49432	1	2							-0.305992	54	17.57	0						1	0	1
209	0	2	1.26181	1	1	2						0.100994	64	17.57	3						1	4.5	2
211	1	1	0.70429	2	2		1.68	8.07	14.36	1.35	9.61	-0.152248	53	33.33	0						5	0	1
213	0	3	5.02067	2	2	2	1.62			7.97	14.67	0.700762	42	19.31	0				4	2	2	0	1
214	1	1	1	1	1		1.83	7.7	18.45	3.87	10.49	0	61	19.03	0						2	0.9	2
215	1	1	2.25205	1	1		0.54	10.32	13.67	2.11	8.84	0.352578	63	20.95	2						2	7.5	2
216	0	3	2.82595	2	2	2				1.21	44.9	0.451164	52	20.81	0				1	1	2	0	1
218	0	3	1.40398	2	2	2	14.93			2.58	11.92	0.147361	67	20.07	0	1	0	0	4	2	2	0	2
219	0	2	27.2848	1	1	2	3.15			11.51	21.06	1.43592	39	27.05	2	0			4	2	4	1.8	1
222	1	1	0.74226	1	1							-0.129444	44	25.01	0						4	45	1
223	1	1	6.50132	1	1		2.68	54.81	33.1	4.35	10.42	0.813002	67	17.14	2						1	40	2
225	0	5	3.73102	1	1	2	2.07	13.07	9.46	4.09	16.47	0.571828	66	24.79	0		0	0	2a	1	3	2.5	2
226	0	3	1.15036	2	2	2	32.41			4.77	13.52	0.0608338	46	22.86	0				3	2	2	0	1
227	0	3	2.69244	2	2	2						0.430146	76	21.64	1	1	0	0	1	1	2	0	2
228	1	1	3.13178	1	1							0.495791	52	20.41	0						2	30	1
230	0	3	1.05668	1	2	2	3.35			1.76	13.34	0.0239435	68	25.81	0				1	1	4	0	2
231	1	1	0.6366	1	1		5.89	13.32	11.15	3.64	9.57	-0.196133	47	19.25							2	21	1
232	0	3	1.33519	2	2	2	6.35		48.66	2.82	12.72	0.125543	63	23.37	0		0	0	2b	2	3	0	2
233	1	1	0.67818	2	2							-0.168655	52	20.02							2	0	1
235	0	3	5.33118	2	2	2						0.726823	59	25.03	1				3	2	4	0	1
236	0	4	1.4213	1	1	1	3.13	9.29	16.35	1.54	16.58	0.152686	53	22.3	0				3	2	2	30	1
239	1	1	0.31078	1	2		1.95	3.8	8.95	2	9.9	-0.507547	43	30.85	0						5	0	1
2	0	3	234.044	1	1	2	56.8			5.15	11.56	2.3693	62	24.32	0		0	0	2a	1		25	2
3	0	4	58.0515	1	1	1	10.2			2.83	20.61	1.76381	51	21.96	1				2a	1	2	30	1
4	0	2	26.8287	1	1	2	1.78			37.88	12.76	1.4286	68	20.76	2				4	2	2	50	2
5	0	3	34.1788	1	1	2						1.53376	52	19.37	2		0	0	4	2	2	45	1
7	0	2	26.922	1	1	2						1.43011	63	24.97	0				1	1		35	2
8	0	3	32.0439	2	2	2	1.98	11.67	23.28	1.11	10.85	1.50575	64	24.6		0	0	0	1	1	3	0	2
9	0	3	113.903	1	1	2						2.05653	52	29.7			0	0	1	1	4	30	1
11	0	3	7.68703	2	2	2						0.885759	67	28.55	0		0	0	1	1	4	0	2
12	0	3	10.0186	2	2	2						1.00081	47	21.48					1	1	2	0	1
15	0	3	55.0512	2	2	2	2.46			1.87	12.59	1.74077	48	27.92	0		0	0	3	2	4	0	1
17	0	4	7.39612	1	2	1						0.869004	75	27.92	2						4	0	2
18	0	3	75.7998	1	1	2	89.23			4.27	13.23	1.87967	64	24.31	1				4	2	3	4	2
19	1	1	4.0931	1	2							0.612052	66	26.17							4	0	2
20	1	1	10.7838	1	1							1.03277	72	23.87	0						3	46	2
21	1	1	8.18266	1	1		1.57	14.73	92.36	3.33	14.38	0.912895	58	27.39							4	0	1
22	0	3	1.93704	2	2	2						0.287139	52	21.17	0				3	2	2	0	1
23	1	1	3.81147	1	1							0.581093	62	21.77	0						2	40	2
24	0	3	9.4038	1	1	2	28.49			3.84	26.32	0.973303	65	21.23	0		0	0	3	2	2	50	2
25	1	1	6.32194	2	2		1.81			0.79	15.17	0.80085	67	21.24	0						2	0	2
26	0	3	2.83032	1	1	2	210.7			179.6	23.35	0.451836	74	24.8	2				4	2	3	60	2
27	0	3	8.1613	2	2	2	13.85			9.21	17.43	0.911759	47	19.56	0		0	0	3	2	2	0	1
28	0	2	5.47266	1	1	2						0.738198	67	25.34	1		0	0	3	2	4	4	2
29	0	3	4.91841	2	2	2	729.5	130.5	273.7	9.91	9.98	0.691825	69	25.4	0		0	0	4	2	4	0	2
30	0	3	10.1877	2	2	2	383.2			17.83	35.16	1.00808	64	17.57	0		0	0	4	2	1	0	2
